# Supplementary material
Source: MDPI journal article supplement (https://www.mdpi.com/2071-1050/11/6/1809)
Supplement: s1 [file s1]

# SUPPLEMENTARY MATERIAL

## ONLINE QUESTIONNAIRE (Translated)

### Introduction

This questionnaire aims to explore people's aesthetic preferences regarding vegetation-created enclosure in Chinese urban parks. This research mainly focuses on shaping different combinations of visual and physical enclosure in order to develop a framework, which is appropriate for small-scale landscape research projects. Based on the public engagement and theories of environmental psychology, the results of this study will improve the regeneration strategies of urban parks. This online questionnaire is divided into three parts, and has a total of 59 questions. In the aesthetic preference investigation phase, you will be shown four different scenarios (A, B, C, D). You will be expected to complete the whole survey in about 15 minutes. And Please answer all questions with your first impressions.

- The first part: basic demographic information (private information will be protected and used in this specific research only).
- The second part: potential use of urban parks.
- The third part: aesthetic preferences (look at the pictures and answer the questions).

This questionnaire has been approved by the ethical review process. Please pay attention to the following items before you begin to answer the questionnaire:

- ✓ I have read and understood the purpose of this study, and agreed to take part in the investigation.
- ✓ Participating in the questionnaire is voluntary. Everyone can withdraw his or her participation in the survey at any time.
- ✓ The questionnaire is anonymous. The researchers or the investigators could use the questionnaire data and analyze it.

If you have read the above instructions and agree to participate in the questionnaire, please click on [next page].

### Demographic

1. Gender

A: male; B: female

2. Age

A: younger than 18; B: 18-24; C: 25-34; D: 35-44; E: 45-54; F: 55-64; G: older than 65

### 3. Occupation

A: student; B: office staff; C: self-employed businessman; D: retired; E: looking for a job; F: unemployed; G: others

### 4. Education

A: high school; B: undergraduate; C: technical school; D: masters or PhD; E: others

5. Have you ever received design or related professional training? (art and design, sculpture, landscape, architecture, urban planning or urban design )

A: yes; B: no

### Potential Use

6. Are you familiar with the urban parks in the southern part of China?

A: very familiar, always go; B: familiar, though I live in the southern part of China, I do not often go to urban parks; C: unfamiliar, I had ever gone to the urban parks when I travelled to southern part of China; D: never

7. What kind of activity will you do if you go to urban parks? (multiple-choice)

A: sitting or lying on the lawn/benches; B: meeting with friends; C: have a picnic; D: Tai Ji etc. static activities; E: ball game etc. dynamic activities; F: singing/dancing/playing instruments; G: taking photos; H: others

8. How often will you go to urban parks?

A: everyday; B: once a week; C: once a month; D: once a quarter; E: twice a year; F: once a year; G: never

9. When will you go to urban park? (multiple-choice)

A: 6:00-9:00; B: 9:00-12:00; C:12:00-15:00; D:15:00-18:00; E: 18:00-21:00

10. How long will you stay in urban parks?

A: just passing by, will not stay in the park; B: about one hour; C: two to three hours; D: more than three hours

11. What are the primary reasons why you go to urban parks?

A: staying alone; B: entertainment; C: meeting with friends; D: doing sports; E: taking part in different kinds of activities and meeting new friends; F: others

## Aesthetic Preference

13-59. Aesthetic preference questions (every image was repeated three times and the following three questions were asked)

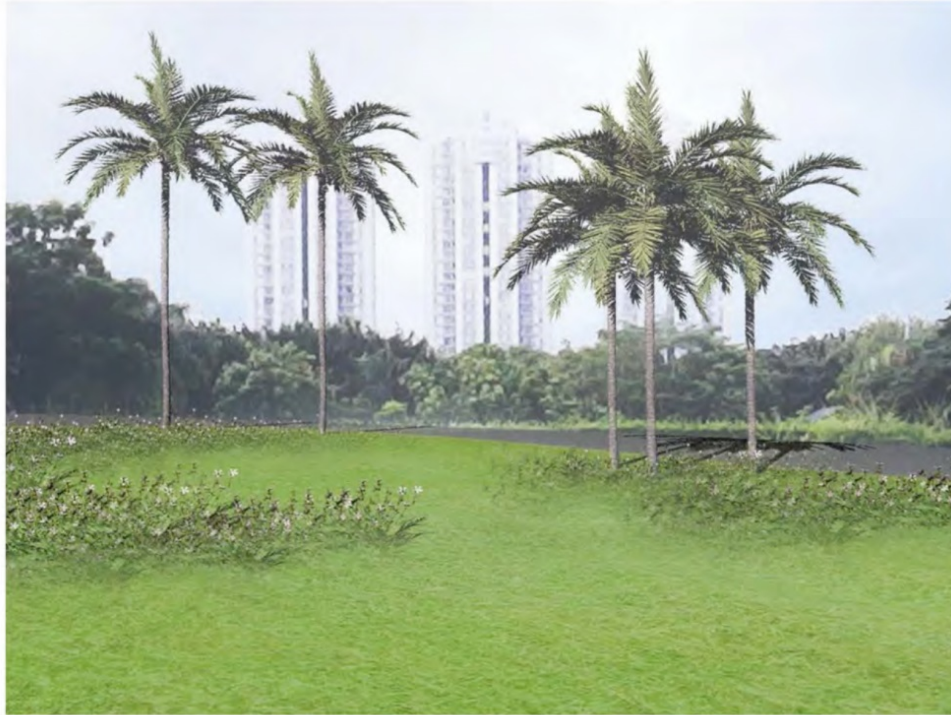

\* 13. [ Scene A-1] How do you rate the degree of pleasantness of the scene shown in the picture?

very pleasant      pleasant      ok      unpleasant      very unpleasant

                      

\* 14. [Scene A-1] Do you think the scene showing in the picture is appropriate to bear a lot of functions?

very appropriate      appropriate      ok      inappropriate      very inappropriate

                      

\* 15. [Scene A-1] How do you rate the degree of the legibility of the scene shown in the picture?

very legible      legible      ok      illegible      very illegible
